# Supplementary material for: Dysregulated microRNA Expression in Serum of Non-Vaccinated Children with Varicella
Source: PubMed Central journal article supplement (PMC4014722; doi:10.3390/v6041823), 2014-04-22
Supplement: viruses-06-01823-s001.pdf [file viruses-06-01823-s001.pdf]

## Supplementary Information

**Table S1.** Differential expressed miRNAs in VZV- infected patients compared with controls.

| <b>Detector</b>        | <b><math>\Delta\Delta Ct</math></b> |
|------------------------|-------------------------------------|
| hsa-miR-508-5p-4395203 | -16.34                              |
| hsa-miR-122-4395356    | -12.77                              |
| hsa-miR-132-4373143    | -12.58                              |
| hsa-miR-495-4381078    | -11.55                              |
| hsa-miR-10a-4373153    | -11.33                              |
| hsa-miR-425-4380926    | -10.82                              |
| hsa-miR-133a-4395357   | -10.67                              |
| hsa-miR-197-4373102    | -10.55                              |
| hsa-miR-204-4373094    | -10.54                              |
| hsa-let-7a-4373169     | -10.38                              |
| hsa-miR-369-3p-4373032 | -8.95                               |
| hsa-miR-487b-4378102   | -8.55                               |
| hsa-miR-10b-4395329    | -8.06                               |
| hsa-miR-220-4373078    | -7.98                               |
| hsa-miR-342-5p-4395258 | -7.78                               |
| hsa-miR-1-4395333      | -7.48                               |
| hsa-miR-374b-4381045   | -7.28                               |
| hsa-miR-452-4395440    | -7.14                               |
| hsa-miR-363-4378090    | -7.09                               |
| hsa-miR-302b-4378071   | -7.06                               |
| hsa-miR-493-4395475    | -6.94                               |
| hsa-let-7e-4395517     | -6.94                               |
| hsa-miR-512-3p-4381034 | -6.86                               |
| hsa-miR-433-4373205    | -6.81                               |
| hsa-miR-500-4395539    | -6.37                               |
| hsa-miR-551b-4380945   | -6.23                               |
| hsa-miR-502-3p-4395194 | -6.06                               |
| hsa-miR-598-4395179    | -6.02                               |
| hsa-miR-376b-4373196   | -5.97                               |
| hsa-miR-211-4373088    | -5.92                               |
| hsa-miR-26a-4395166    | -5.89                               |
| hsa-miR-885-5p-4395407 | -5.85                               |
| hsa-miR-542-3p-4378101 | -5.77                               |
| hsa-miR-16-4373121     | -5.75                               |
| hsa-miR-518e-4395506   | -5.64                               |
| hsa-miR-374a-4373028   | -5.62                               |
| hsa-miR-518f-4395499   | -5.53                               |
| hsa-miR-362-5p-4378092 | -5.48                               |
| hsa-miR-367-4373034    | -5.47                               |
| hsa-miR-519d-4395514   | -5.28                               |
| hsa-miR-195-4373105    | -5.28                               |
| hsa-miR-150-4373127    | -5.20                               |
| hsa-miR-627-4380967    | -5.18                               |

**Table S1.** *Cont.*

| <b>Detector</b>         | <b><math>\Delta\Delta Ct</math></b> |
|-------------------------|-------------------------------------|
| hsa-miR-183-4395380     | -5.14                               |
| hsa-miR-20a-4373286     | -5.02                               |
| hsa-let-7g-4395393      | -4.94                               |
| hsa-miR-486-3p-4395204  | -4.92                               |
| hsa-miR-652-4395463     | -4.88                               |
| hsa-miR-139-5p-4395400  | -4.86                               |
| hsa-miR-223-4395406     | -4.82                               |
| hsa-miR-496-4386771     | -4.81                               |
| hsa-miR-365-4373194     | -4.74                               |
| hsa-miR-20b-4373263     | -4.73                               |
| hsa-miR-379-4373349     | -4.70                               |
| hsa-miR-93-4373302      | -4.62                               |
| hsa-miR-369-5p-4373195  | -4.61                               |
| hsa-let-7b-4395446      | -4.61                               |
| hsa-miR-26b-4395167     | -4.56                               |
| hsa-miR-339-3p-4395295  | -4.52                               |
| hsa-miR-501-5p-4373226  | -4.49                               |
| hsa-miR-362-3p-4395228  | -4.46                               |
| hsa-miR-454-4395434     | -4.35                               |
| hsa-miR-15b-4373122     | -4.35                               |
| hsa-miR-873-4395467     | -4.29                               |
| hsa-miR-17-4395419      | -4.29                               |
| hsa-miR-342-3p-4395371  | -4.23                               |
| hsa-miR-126-4395339     | -4.18                               |
| hsa-miR-483-5p-4395449  | -4.15                               |
| hsa-miR-30b-4373290     | -4.15                               |
| hsa-miR-491-5p-4381053  | -4.12                               |
| hsa-miR-30c-4373060     | -4.10                               |
| hsa-miR-192-4373108     | -4.08                               |
| hsa-miR-886-5p-4395304  | -4.06                               |
| hsa-miR-24-4373072      | -4.05                               |
| hsa-miR-330-3p-4373047  | -4.00                               |
| hsa-miR-186-4395396     | -4.00                               |
| hsa-miR-125a-5p-4395309 | -3.99                               |
| hsa-miR-340-4395369     | -3.97                               |
| hsa-miR-886-3p-4395305  | -3.95                               |
| hsa-miR-376c-4395233    | -3.95                               |
| hsa-miR-19a-4373099     | -3.93                               |
| hsa-miR-222-4395387     | -3.91                               |
| hsa-miR-142-5p-4395359  | -3.82                               |
| hsa-miR-106a-4395280    | -3.81                               |
| hsa-miR-484-4381032     | -3.79                               |
| hsa-miR-185-4395382     | -3.71                               |
| hsa-miR-660-4380925     | -3.68                               |

**Table S1.** *Cont.*

| <b>Detector</b>         | <b><math>\Delta\Delta Ct</math></b> |
|-------------------------|-------------------------------------|
| hsa-miR-29b-4373288     | -3.67                               |
| hsa-miR-28-3p-4395557   | -3.65                               |
| hsa-miR-18a-4395533     | -3.63                               |
| hsa-miR-146a-4373132    | -3.62                               |
| hsa-miR-629-4395547     | -3.59                               |
| has-miR-155-4395459     | -3.58                               |
| hsa-miR-324-3p-4395272  | -3.58                               |
| hsa-miR-590-5p-4395176  | -3.56                               |
| hsa-miR-140-3p-4395345  | -3.54                               |
| hsa-miR-628-5p-4395544  | -3.53                               |
| hsa-miR-19b-4373098     | -3.47                               |
| hsa-miR-28-5p-4373067   | -3.44                               |
| hsa-miR-191-4395410     | -3.43                               |
| hsa-miR-199a-3p-4395415 | -3.43                               |
| hsa-miR-21-4373090      | -3.41                               |
| hsa-miR-618-4380996     | -3.40                               |
| hsa-miR-34a-4395168     | -3.39                               |
| hsa-miR-489-4395469     | -3.39                               |
| hsa-miR-140-5p-4373374  | -3.38                               |
| hsa-miR-532-5p-4380928  | -3.37                               |
| hsa-miR-146b-5p-4373178 | -3.37                               |
| hsa-miR-182-4395445     | -3.34                               |
| hsa-miR-298-4395301     | -3.33                               |
| hsa-miR-193b-4395478    | -3.32                               |
| hsa-miR-100-4373160     | -3.29                               |
| hsa-miR-518a-3p-4395508 | -3.29                               |
| hsa-miR-92a-4395169     | -3.27                               |
| hsa-miR-655-4381015     | -3.25                               |
| hsa-miR-486-5p-4378096  | -3.23                               |
| hsa-miR-532-3p-4395466  | -3.22                               |
| hsa-miR-451-4373360     | -3.21                               |
| hsa-miR-181c-4373115    | -3.16                               |
| hsa-miR-199a-5p-4373272 | -3.14                               |
| hsa-miR-494-4395476     | -3.12                               |
| hsa-miR-410-4378093     | -3.10                               |
| hsa-miR-194-4373106     | -3.10                               |
| hsa-miR-450b-3p-4395319 | -3.09                               |
| hsa-miR-345-4395297     | -2.96                               |
| hsa-miR-142-3p-4373136  | -2.95                               |
| hsa-miR-361-5p-4373035  | -2.94                               |
| hsa-miR-320-4395388     | -2.94                               |
| hsa-miR-335-4373045     | -2.92                               |
| hsa-miR-148b-4373129    | -2.87                               |
| hsa-miR-337-5p-4395267  | -2.81                               |

**Table S1. Cont.**

| <b>Detector</b>        | <b><math>\Delta\Delta Ct</math></b> |
|------------------------|-------------------------------------|
| hsa-miR-200c-4395411   | -2.73                               |
| hsa-miR-423-5p-4395451 | -2.71                               |
| hsa-miR-143-4395360    | -2.69                               |
| hsa-miR-29a-4395223    | -2.68                               |
| hsa-miR-106b-4373155   | -2.66                               |
| hsa-miR-331-3p-4373046 | -2.62                               |
| hsa-miR-455-5p-4378098 | -2.62                               |
| hsa-miR-296-5p-4373066 | -2.62                               |
| hsa-miR-99b-4373007    | -2.57                               |
| hsa-miR-708-4395452    | -2.57                               |
| hsa-miR-9-4373285      | -2.55                               |
| hsa-miR-373-4378073    | -2.54                               |
| hsa-miR-221-4373077    | -2.54                               |
| hsa-miR-485-3p-4378095 | -2.53                               |
| hsa-miR-328-4373049    | -2.44                               |
| hsa-miR-130b-4373144   | -2.42                               |
| hsa-miR-145-4395389    | -2.42                               |
| hsa-miR-574-3p-4395460 | -2.42                               |
| hsa-miR-101-4395364    | -2.39                               |
| hsa-miR-517c-4373264   | -2.37                               |
| hsa-miR-205-4373093    | -2.30                               |
| hsa-miR-25-4373071     | -2.28                               |
| hsa-miR-411-4381013    | -2.28                               |
| hsa-miR-134-4373299    | -2.27                               |
| hsa-miR-128-4395327    | -2.24                               |
| hsa-miR-301b-4395503   | -2.22                               |
| hsa-let-7d-4395394     | -2.22                               |
| hsa-miR-203-4373095    | -2.20                               |
| hsa-miR-503-4373228    | -2.17                               |
| hsa-miR-27a-4373287    | -2.16                               |
| hsa-miR-625-4395542    | -2.15                               |
| hsa-miR-744-4395435    | -2.13                               |
| hsa-miR-331-5p-4395344 | -2.08                               |
| hsa-miR-545-4395378    | -2.06                               |
| hsa-miR-579-4395509    | -2.02                               |
| hsa-miR-636-4395199    | -2.02                               |
| hsa-let-7c-4373167     | -2.00                               |
| hsa-miR-340*-4395370   | -10.71                              |
| hsa-miR-605-4386742    | -9.64                               |
| hsa-miR-145*-4395260   | -9.32                               |
| hsa-miR-7-1*-4381118   | -9.04                               |
| hsa-miR-15a*-4395530   | -8.58                               |
| hsa-miR-30d*-4395416   | -7.60                               |
| hsa-miR-100*-4395253   | -6.91                               |

Table S1. *Cont.*

| Detector               | $\Delta\Delta Ct$ |
|------------------------|-------------------|
| hsa-miR-214*-4395404   | -6.79             |
| hsa-miR-943-4395299    | -6.61             |
| hsa-miR-541*-4395311   | -6.33             |
| hsa-miR-629*-4380969   | -6.25             |
| hsa-miR-543-4395487    | -6.20             |
| hsa-miR-768-3p-4395188 | -5.78             |
| hsa-miR-411*-4395349   | -5.73             |
| hsa-miR-9*-4395342     | -5.29             |
| hsa-miR-19a*-4395535   | -5.13             |
| hsa-miR-599-4380962    | -4.95             |
| hsa-miR-624*-4380964   | -4.64             |
| hsa-miR-144*-4395259   | -4.57             |
| hsa-miR-18a*-4395534   | -4.51             |
| hsa-miR-656-4380920    | -4.43             |
| hsa-miR-26a-1*-4395554 | -4.35             |
| hsa-miR-29c*-4381131   | -4.32             |
| hsa-miR-551b*-4395457  | -4.32             |
| hsa-miR-29a*-4395558   | -4.29             |
| hsa-miR-126*-4373269   | -4.21             |
| hsa-miR-27a*-4395556   | -4.05             |
| hsa-miR-223*-4395209   | -3.64             |
| hsa-miR-425*-4395413   | -3.58             |
| hsa-miR-148b*-4395271  | -3.46             |
| hsa-miR-923-4395264    | -3.38             |
| hsa-let-7f-1*-4395528  | -3.24             |
| hsa-miR-610-4380980    | -3.24             |
| hsa-miR-190b-4395374   | -3.17             |
| hsa-miR-942-4395298    | -3.13             |
| hsa-miR-30e-4395334    | -3.00             |
| hsa-miR-99a*-4395252   | -2.76             |
| hsa-miR-30a-4373061    | -2.74             |
| hsa-miR-638-4380986    | -2.72             |
| hsa-miR-26b*-4395555   | -2.69             |
| hsa-miR-30d-4373059    | -2.62             |
| hsa-miR-30e*-4373057   | -2.34             |
| hsa-miR-30a*-4373062   | -2.33             |
| hsa-miR-93*-4395250    | -2.26             |
| hsa-miR-151-3p-4395365 | -2.19             |
| hsa-miR-632-4380977    | -2.10             |
| hsa-miR-136*-4395211   | -2.00             |
| hsa-miR-517b-4373244   | 2.03              |
| hsa-miR-302c-4378072   | 2.23              |
| hsa-miR-519a-4395526   | 2.38              |
| hsa-miR-196b-4395326   | 2.50              |

**Table S1.** *Cont.*

| <b>Detector</b>         | <b><math>\Delta\Delta Ct</math></b> |
|-------------------------|-------------------------------------|
| hsa-miR-188-3p-4395217  | 3.31                                |
| hsa-miR-509-5p-4395346  | 3.33                                |
| hsa-miR-193a-3p-4395361 | 3.38                                |
| hsa-miR-383-4373018     | 3.59                                |
| hsa-miR-570-4395458     | 3.79                                |
| hsa-miR-516b-4395172    | 4.00                                |
| hsa-miR-502-5p-4373227  | 4.34                                |
| hsa-miR-302a-4378070    | 4.37                                |
| hsa-miR-449a-4373207    | 4.55                                |
| hsa-miR-184-4373113     | 4.71                                |
| hsa-miR-582-3p-4395510  | 5.19                                |
| hsa-miR-138-4395395     | 7.52                                |
| hsa-miR-382-4373019     | 8.16                                |
| hsa-miR-548b-5p-4395519 | 8.41                                |
| hsa-miR-302c*-4373277   | 2.76                                |
| hsa-miR-92a-1*-4395248  | 2.94                                |
| hsa-miR-581-4386744     | 2.98                                |
| hsa-miR-563-4380940     | 3.17                                |
| hsa-miR-374b*-4395502   | 3.48                                |
| hsa-miR-922-4395263     | 3.50                                |
| hsa-miR-34b*-4373037    | 3.61                                |
| hsa-miR-374a*-4395236   | 3.93                                |
| hsa-miR-604-4380973     | 4.24                                |
| hsa-miR-630-4380970     | 4.96                                |
| hsa-miR-589*-4380953    | 5.04                                |
| hsa-miR-509-3p-4395347  | 6.91                                |
| hsa-miR-770-5p-4395189  | 7.95                                |
| hsa-miR-566-4380943     | 11.71                               |

The different Ct value between two groups was calculated by  $\Delta\Delta Ct$  method:  $\Delta Ct_{\text{patient}} = Ct_{\text{target miRNA}} - Ct_{\text{cel-miR-238}}$ ;

$\Delta Ct_{\text{control}} = Ct_{\text{target miRNA}} - Ct_{\text{cel-miR-238}}$ ;  $\Delta\Delta Ct = \Delta Ct_{\text{patient}} - \Delta Ct_{\text{control}}$ .

© 2014 by the authors; licensee MDPI, Basel, Switzerland. This article is an open access article distributed under the terms and conditions of the Creative Commons Attribution license (<http://creativecommons.org/licenses/by/3.0/>).
